# Supplementary material for: Smoking Attributable Risk in Multiple Sclerosis
Source: Front Immunol. 2022 Mar 3;13:840158. doi: 10.3389/fimmu.2022.840158 (PMC8927036; doi:10.3389/fimmu.2022.840158)
Supplement: Supplementary file 1 [file Table_1.xlsx]

## Sheet: Sheet1
Supplementary Table 1. Summary of genetic risk variants associated with the risk of MS.
RSID	CHR	Position	Allele	OR	Conditioned SNPs
rs4728142	7	128573967	A	1.07
rs4743150	9	100740124	A	0.95
rs34536443	19	10463118	G	0.91	rs1051738, rs12460421
rs1151625	20	62369997	A	0.83
rs3816281	2	68607947	A	1.08
rs13551	1	24180962	G	1.07
12:9833628	12	9833628	A	1.15
rs12132283	1	101294036	C	0.94	rs11587215, rs7532171
rs11587215	1	101311662	A	1.11	rs12132283, rs7532171
rs1335532	1	117100957	G	0.71
rs1801133	1	11856378	A	0.86
rs541503	1	120208297	G	0.93
rs113012729	1	154977113	G	1.27	rs2210918
rs3761959	1	157669278	A	0.89
rs12086448	1	160393905	G	0.95	rs3766374, rs6427540, rs1584250, rs11265585
rs6427540	1	160634588	A	0.93	rs3766374, rs12086448, rs1584250, rs11265585
rs3766374	1	160720554	A	0.92	rs12086448, rs6427540, rs1584250, rs11265585
rs1323292	1	192541021	G	0.83
rs59655222	1	200875897	G	0.89
rs9308424	1	212877776	A	0.93
rs3748817	1	2525665	G	0.9
rs7550552	1	25299602	A	0.92
rs10914539	1	32715641	A	1.14
rs3007421	1	6530189	A	1.13
rs72922276	1	65429319	A	0.82
rs12087340	1	85746993	A	1.24	rs233100
rs233100	1	85772009	A	0.94	rs12087340
rs9887787	1	92222143	A	0.94	rs11577426, rs58394161, rs10747454
rs58394161	1	92939959	G	1.11	rs11577426, rs9887787, rs10747454
rs11577426	1	93160238	A	1.08	rs9887787, rs58394161, rs10747454
rs10747454	1	93429247	A	1.07	rs11577426, rs9887787, rs58394161
rs793108	10	31415106	G	0.93
rs2104286	10	6099045	G	0.93	rs62626325
rs62626325	10	6121285	A	0.87	rs2104286
rs224032	10	64521829	G	1	rs7915475
rs17741873	10	75653800	A	0.97
rs1399180	10	8098719	A	0.86	rs10905353
rs1250568	10	81045280	G	1.09
rs7923837	10	94481917	A	0.94
rs585039	11	118563381	A	0.86	rs6589706, rs12365699, rs77841686
rs12365699	11	118743286	A	0.89	rs6589706, rs585039, rs77841686
rs6589706	11	118747813	A	1.09	rs12365699, rs585039, rs77841686
rs77841686	11	118762073	A	0.76	rs6589706, rs12365699, rs585039
rs11605422	11	122534190	A	1.08
rs3809006	11	128410836	G	1.09
rs11023242	11	14529099	A	0.95	rs116970203
rs116970203	11	14876718	A	1.34	rs11023242
rs1059091	11	309127	G	0.92
rs3931757	11	36437982	G	1.01
rs2957873	11	47249294	G	1.1
rs506616	11	60835043	A	0.88
rs694739	11	64097233	G	0.92
rs531612	11	65705432	G	0.93
rs4409785	11	95311422	G	1.15	rs72981578
rs72981578	11	95420123	A	1.14	rs4409785
rs3184504	12	111884608	A	1.08
rs883263	12	123485188	A	1.12
rs10877012	12	58162085	A	0.87
rs1800693	12	6440009	G	1.46	rs2364482, rs767455, rs1059501
rs767455	12	6450945	G	0.82	rs1800693, rs2364482, rs1059501
rs2364482	12	6502131	C	1.09	rs1800693, rs767455, rs1059501
rs61708525	12	94661453	G	1.05
rs4772201	13	100086259	G	0.87
rs9591325	13	50811220	G	0.83	rs9562970
rs9562970	13	51002615	A	1.05	rs9591325
rs10141746	14	103237259	A	1.04	rs8006649, rs10143247
rs8006649	14	103276855	A	1.06	rs10141746, rs10143247
rs4468527	14	52325131	A	1.09
rs8022092	14	69265564	A	0.9
rs175706	14	75976200	G	1.1
rs117822168	14	88504511	A	0.77
rs10152892	15	79231203	C	0.89
rs7183707	15	90883733	A	1.08
rs108990	16	1065433	G	1.1
rs1985372	16	11114839	A	0.91	rs12708716, rs12928822+rs36090551
rs12708716	16	11179873	G	0.88	rs12928822, rs36090551, rs1985372
rs12928822	16	11403893	A	0.86	rs12708716, rs36090551, rs1985372
rs36090551	16	11443873	A	1.1	rs12708716, rs12928822, rs1985372
rs4609871	16	29932064	G	0.88
rs9937051	16	57106671	A	1.1
rs12925972	16	79111297	A	0.88	rs7196953, rs17797448
rs17797448	16	79348278	A	0.85	rs12925972, rs7196953
rs7196953	16	79649394	A	1.07	rs12925972, rs17797448
rs35703946	16	86021505	A	0.86
rs2306593	17	34866546	A	0.9
rs9909593	17	37970149	G	1.06	rs883871
rs883871	17	38252660	A	1.15	rs9909593
rs17886724	17	40496163	G	1.12
rs7216796	17	43392208	G	0.97
rs11079784	17	45702280	A	0.92
rs8070345	17	57816757	A	1.14
rs9913257	17	73320893	G	1.06
rs9947399	18	56271544	G	1.12	rs4545915, rs12456687, rs1429574
rs4545915	18	56422868	A	0.92	rs9947399, rs12456687, rs1429574
rs1610555	18	67543147	A	1.05	rs12605088, rs9956999
rs1051738	19	10577843	A	0.91	rs34536443, rs12460421
rs12460421	19	10981352	G	0.95	rs1051738, rs34536443
rs1870071	19	16505106	G	1.08
rs11554159	19	18285944	A	0.87
rs2992	19	4443046	G	1.06
rs7260482	19	45143942	C	1.06
rs307896	19	47661493	A	0.94
rs8107548	19	49870643	G	1.06
rs1077667	19	6668972	A	0.87
rs12373588	2	112466265	C	1.11	rs57116599
rs57116599	2	112770799	A	0.99	rs12373588
rs1534422	2	12640741	G	1.06
rs11897084	2	136861225	A	1.11
rs962052	2	151644203	G	1.09
rs6738544	2	191989356	A	0.92
rs6435203	2	204611195	G	0.94	rs6725887
rs35540610	2	231121829	G	1.13
rs2082881	2	25038268	G	1.05	rs13428812, rs13007284
rs10171296	2	30481309	G	0.9
rs17030410	2	43356490	C	0.88
rs2278300	2	61176073	A	0.93
rs11673987	2	65597671	G	0.93
rs6072343	20	39968188	A	1.05
rs4812773	20	42579148	A	0.93
rs6032662	20	44734310	G	1.05
rs719219	20	48435408	A	1.05	rs6095978
rs2616277	20	52745040	A	1.12	rs2248359
rs2248359	20	52791518	A	0.91	rs2616277
rs9808753	21	34787312	G	1.06
rs1041796	21	39852472	G	1.14	rs9977672
rs2283792	22	22131125	C	1.11
rs2027982	22	31593435	A	0.93
rs4821544	22	37258503	G	0.95	rs2413436, rs132634, rs5756532
rs2413436	22	37312561	A	1.08	rs4821544, rs132634, rs5756532
rs137956	22	40293463	G	1.04	rs3827380, rs760482
rs361725	22	50971047	A	1.15
rs77958473	3	100902575	G	0.93	rs771767
rs771767	3	101748638	A	1.07	chr3:100902575
rs2289746	3	105455955	A	0.92
rs138433213	3	112693983	C	0.75	rs11929640, rsS2271498
rs9843355	3	119228508	A	0.87
rs12695416	3	121551570	A	0.95	rs2255214, rs9282641
rs2255214	3	121770539	A	0.86	rs12695416, rs9282641
rs9282641	3	121796768	A	0.89	rs2255214, rs12695416
rs9846396	3	141140968	A	0.94
rs75029101	3	159628081	A	1.11	rs1014486
rs1014486	3	159691112	G	1.07	chr3:159628081
rs10936599	3	169492101	A	0.94
rs12106877	3	18709522	G	1.08
rs969625	3	187567888	A	1.06	rs9839229
rs9839229	3	188000625	A	1.05	rs969625
rs12330493	3	27791614	C	1.09	rs438613
rs438613	3	28072086	G	1.17	rs12330493
rs6550177	3	32979088	G	0.92
rs9878602	3	71535338	C	0.93
rs7665090	4	103551603	A	0.9	rs151412
rs2726518	4	106173199	A	0.91
rs7690934	4	109025865	A	1.09
rs17051321	4	122119449	A	1.06
rs13150896	4	164499489	A	0.95
rs6832151	4	40303633	C	1.08	rs7698247+chr4:40282435
rs17470892	4	48143201	G	1.06
rs2705618	4	87837546	G	1.08
rs32658	5	118703662	A	1.05	rs28762138
rs756699	5	133446575	G	0.87	rs2084007
rs2084007	5	133891282	A	0.96	rs756699
rs249677	5	141539339	C	0.9
rs2546890	5	158759900	G	0.96
rs35716097	5	176806636	A	1.13
rs11567694	5	35857704	G	0.88
rs11740512	5	40424048	C	1.22	rs9292776
rs9292776	5	40437845	A	1.05	rs11740512
rs71624119	5	55440730	A	0.91
rs34681760	5	6712834	A	0.88
rs11542663	6	119215402	C	0.94
rs802725	6	128282029	C	0.92
rs6928313	6	130368508	G	0.92	rs9375674
rs9321490	6	135494875	G	1.14	rs12206850
rs12206850	6	135797808	G	1.1	rs9321490
rs17066096	6	137452908	G	1.17	rs35858108, rs17780429, rs12526339, rs11754268
rs35858108	6	137970958	A	1.09	rs17066096, rs17780429, rs12526339, rs11754268
rs17780429	6	138222588	A	0.84	rs17066096, rs35858108, rs12526339, rs11754268
rs12206238	6	143867406	A	1.13
rs17119	6	14719496	G	0.88
rs212397	6	159474624	C	0.85
rs719316	6	16672760	G	0.95
rs879036	6	36349890	A	1.14
rs13193887	6	7128198	C	1.06
rs72928038	6	90976768	A	1.11
rs3801275	7	105751772	G	0.88
rs10271373	7	138729795	A	1.03
rs735120	7	149313811	A	0.97
rs6952809	7	2448493	A	1.05	rs10951042
rs706015	7	27014988	C	1.03	rs73075577
rs10245867	7	28142186	A	1.04
rs10951042	7	3139417	G	1.1	rs6952809
rs60600003	7	37382465	C	1.05
rs921911	7	50241812	G	0.92	rs28625973
rs28625973	7	50334208	G	0.9	rs921911
rs2445610	8	128197088	G	1.06	rs16902700, rs4410871
rs4410871	8	128815029	A	0.86	rs16902700, rs2445610
rs16902700	8	129198885	A	1.15	rs4410871, rs2445610
rs7014582	8	144990528	G	1.03
rs6999228	8	79557844	A	1.07
rs78456818	8	95826590	G	1.25	rs11777523
Variants and conditioned SNPs used to derive effect (Odds Ratio, OR) was presented in Patsopoulos, et al., 2019 (Science).
